# Supplementary material for: Enrichment of NPC1-deficient cells with the lipid LBPA stimulates autophagy, improves lysosomal function, and reduces cholesterol storage
Source: PubMed Central journal article supplement (PMC8294588; doi:10.1016/j.jbc.2021.100813), 2021-05-21
Supplement: mmc1.pdf [file mmc1.pdf]

Supplementary information

**Enrichment of NPC1-deficient cells with the lipid LBPA stimulates autophagy, improves lysosomal function, and reduces cholesterol storage**

Olga Ilnytska, Kimberly Lai, Kirill Gorshkov, Mark L. Schultz, Bruce Nguyen Tran, Maciej Jeziorek, Thaddeus J. Kunkel, Ruth D. Azaria, Hayley S. McLoughlin, Miriam Waghalter, Yang Xu, Michael Schlame, Nihal Altan-Bonnet, Wei Zheng, Andrew P. Lieberman, Radek Dobrowolski, Judith Storch

# Supplemental Figures

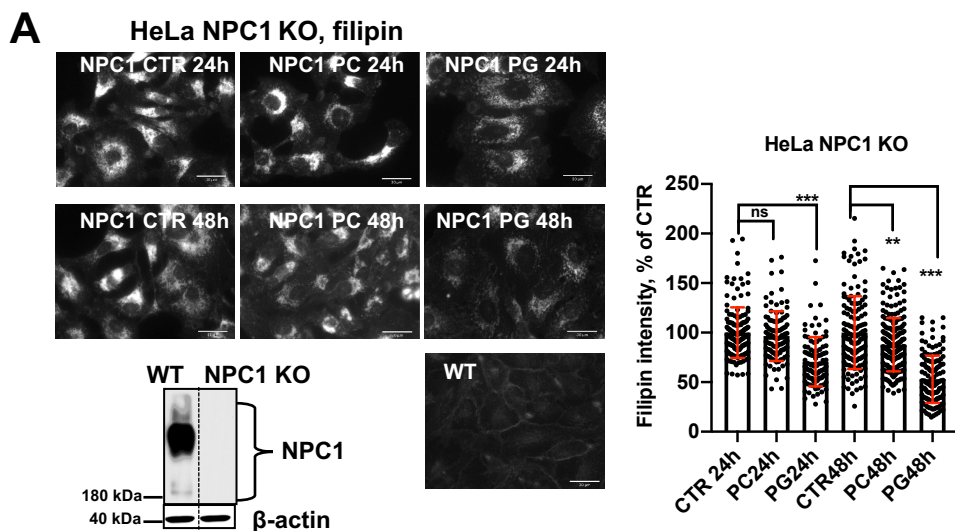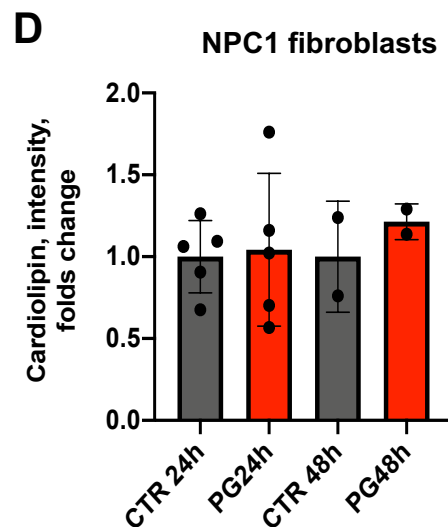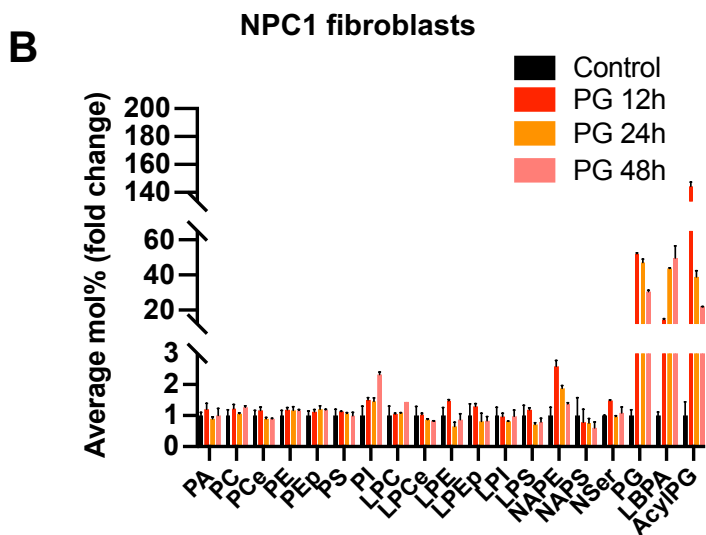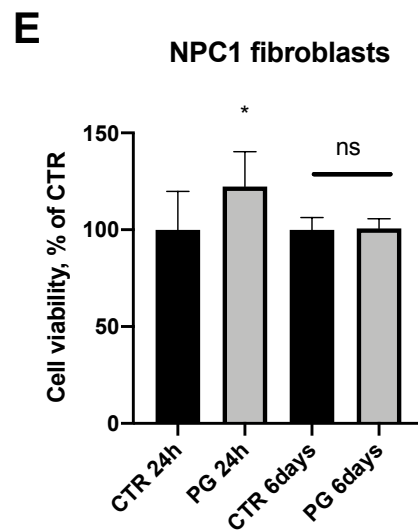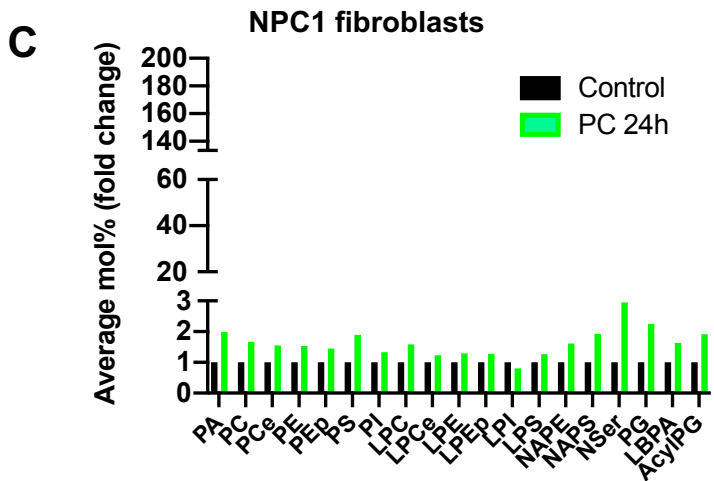

**Fig. S1. Related to Fig. 1. Phospholipid composition of NPC1 mutant fibroblasts treated with PG.**

*A*, representative filipin images and quantification of filipin intensity in parental (WT) and PG or PC treated CRISPR-Cas9 edited NPC1 KO HeLa cells. Western blot demonstrates stable NPC1 gene deletion. In Western Blot samples were analyzed in biological replicates. For each condition one band was cropped and bands for WT and NPC1 KO were spliced. Splicing is indicated with a vertical line. In images, bar=30 $\mu$ m. Data from 2 independent experiments. N=100-200 cells/condition. *B*, LC-MS analysis of NPC1-mutant fibroblasts treated with 100 $\mu$ M PG for 12, 24 and 48h. Bar graph indicate fold-change of average relative mol% of all lipids measured, normalized to untreated CTR. N=2. *C*, LC-MS analysis of NPC1-mutant fibroblasts treated with 100 $\mu$ M PC for 24h. Bar graph indicate fold-change of average relative mol% of all lipids measured, normalized to CTR. *D*, LC-MS analysis of cardiolipin in NPC1-deficient fibroblasts treated with 100 $\mu$ M PG for 24 and 48h relative to untreated CTR. *E*, Cell viability assay in NPC1 deficient cells treated with PG. All graphed data show mean  $\pm$ SD. \*p<0.05, \*\*:p<0.01, \*\*\*:p<0.001 compared to untreated cells (CTR) in two-tailed Student's test.

Nomenclature abbreviations are: PA, phosphatidic acid; PC, phosphatidylcholine; PCe, ether phosphatidylcholine; PE, phosphatidylethanolamine; PEp, plasmalogen phosphatidylethanolamine; PG, phosphatidylglycerol; PI, phosphatidylinositol; PS, phosphatidylserine; LPC, lysophosphatidylcholine; LPCe, ether lysophosphatidylcholine; LPE, lysophosphatidylethanolamine; LPEp, plasmalogen lysophosphatidylethanolamine; LPI, lysophosphatidylinositol; LBPA lysobisphosphatidic acid; AcylPG acyl phosphatidylglycerol, NAPE N-acyl phosphatidylethanolamine, NAPS N-acyl-phosphatidylserine, NSer N-acylserine

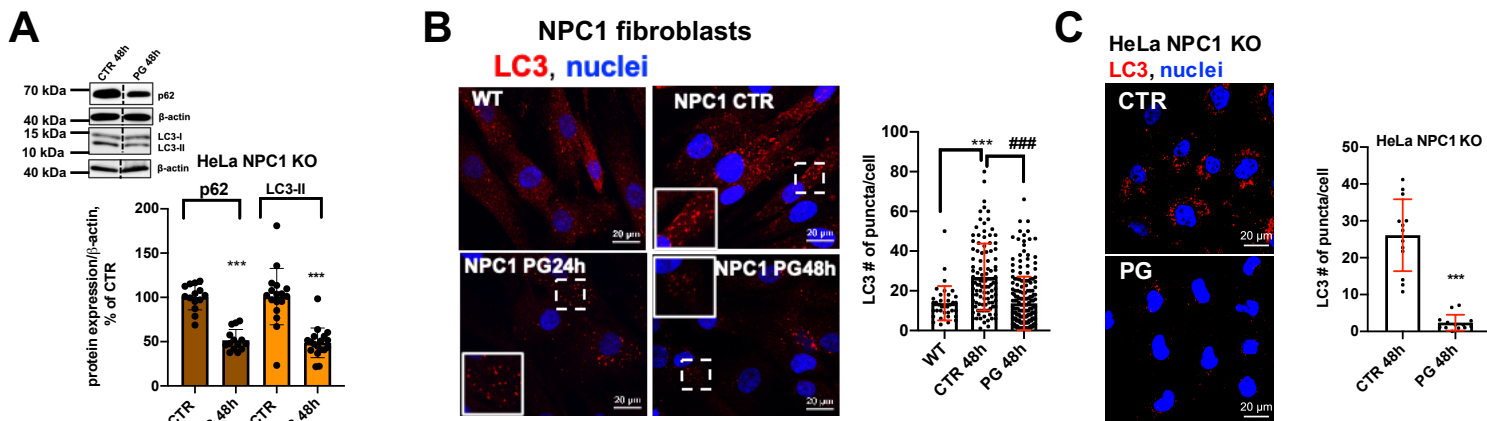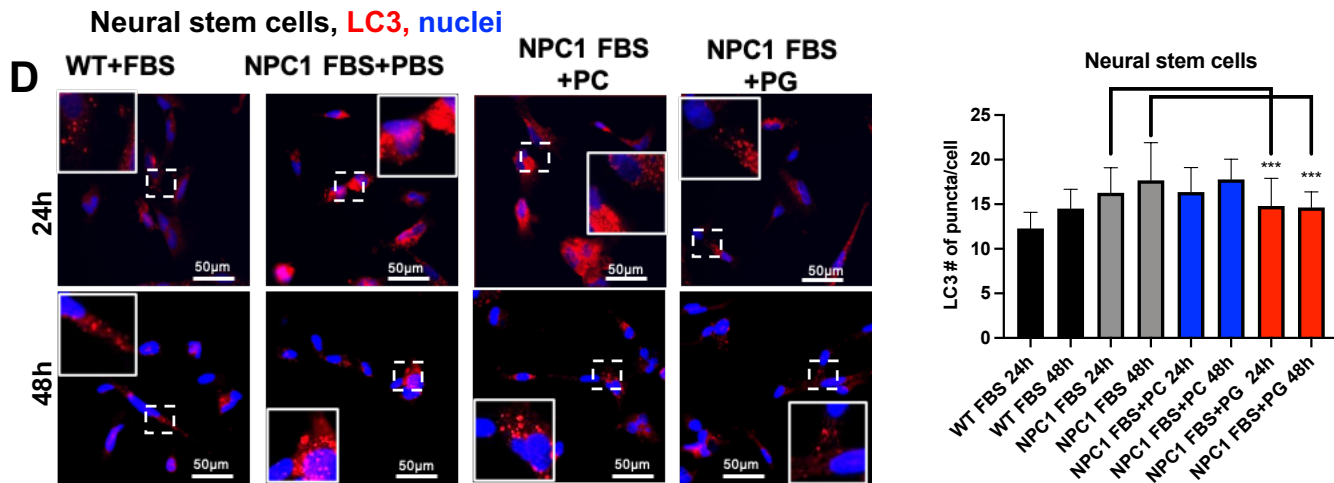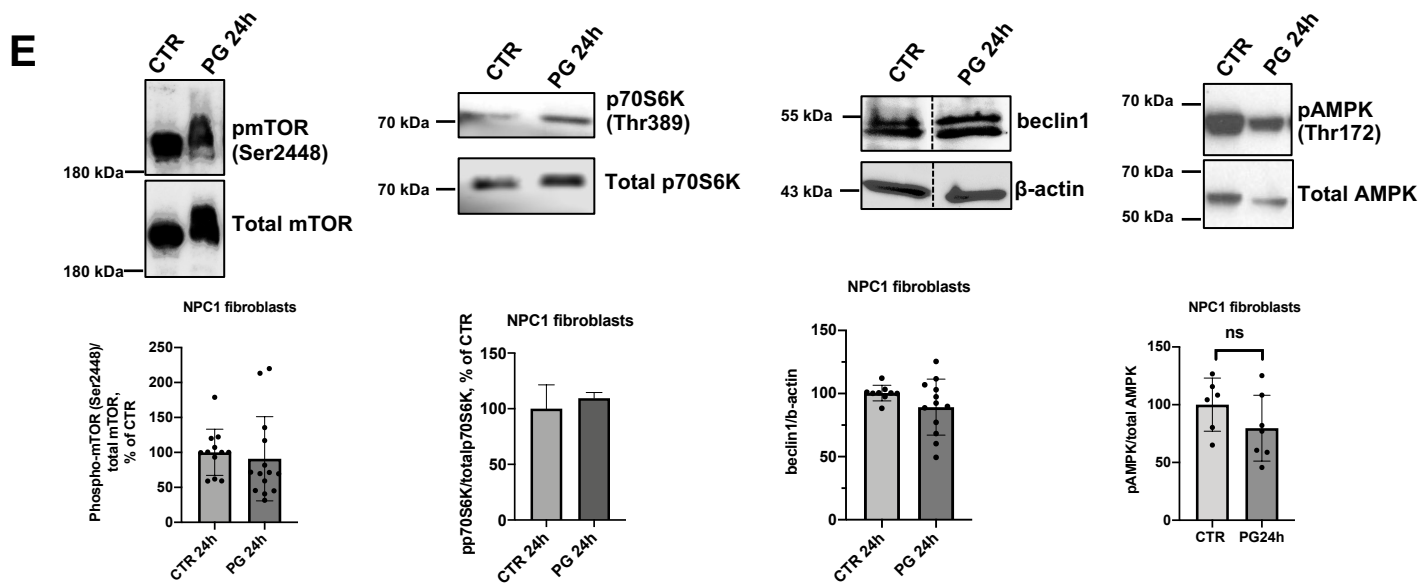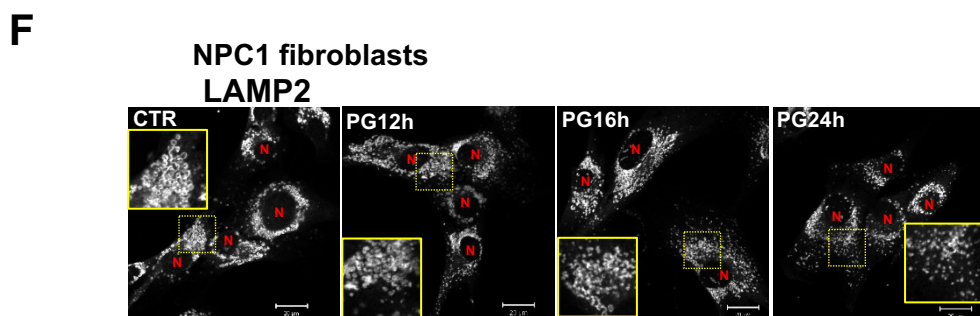

**Fig. S2. Related to Fig. 2 and 3. PG treatment does not alter early autophagic markers in NPC1-deficient fibroblasts**

*A*, Western Blot analysis and quantification of LC3-II and p62 in control and PG-treated NPC1 KO HeLa cells at 48h post-treatment. Data from 3-5 independent experiments. On the upper panel samples were analyzed in biological replicates. For each condition one band was cropped and bands for CTR and PG were spliced. Splicing is indicated with a vertical line. *B*, Representative images and quantification of LC3-positive puncta in NPC1 fibroblasts at 48h. Scale bar, 20 $\mu$ m. N>60 cells/condition. *C*, Representative confocal images and quantification of LC3 staining in control and PG-treated NPC1 KO HeLa cells at 48h post-treatment. *D*, Representative images and quantification of LC3 puncta in neural stem cells treated with 50 $\mu$ M PC or PG liposomes. *E*, Western Blot analysis and quantification of autophagy markers in NPC1-deficient fibroblasts. Splicing is indicated with a vertical line. *F*, Time course of labeled with LAMP2 LY distribution in NPC1 deficient fibroblasts treated with PG. Insets illustrate the size of LY. N-nuclei. Scale bar, 20 $\mu$ m. All graphed data show mean  $\pm$ SD. \*\*\*:p<0.001 compared to untreated cells (CTR) in two-tailed t-test. Error bars indicate SD.

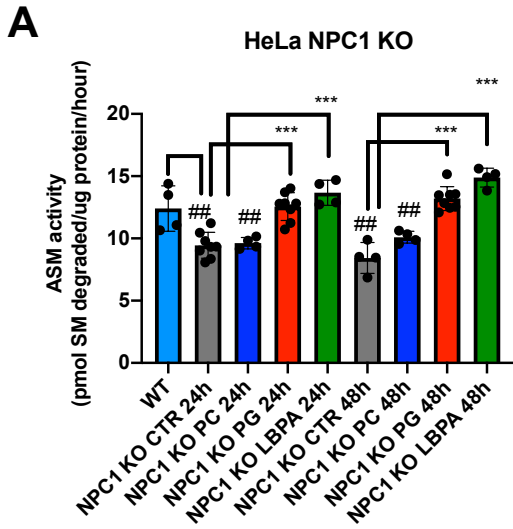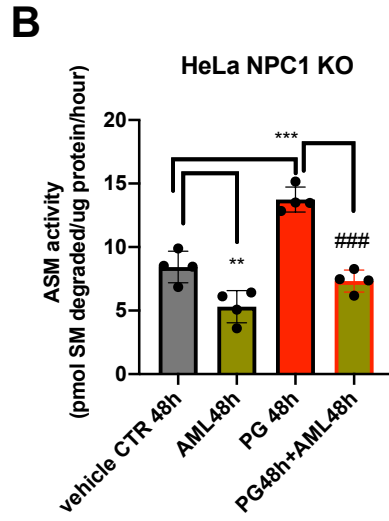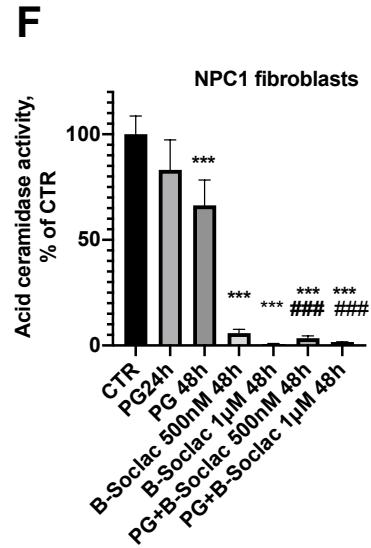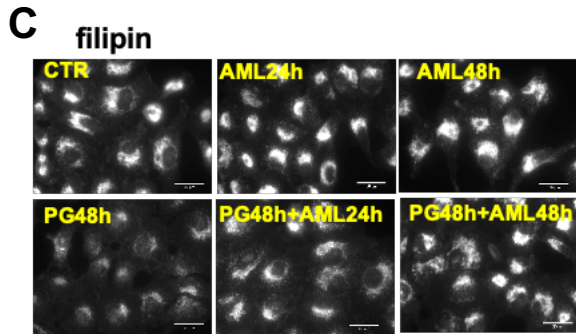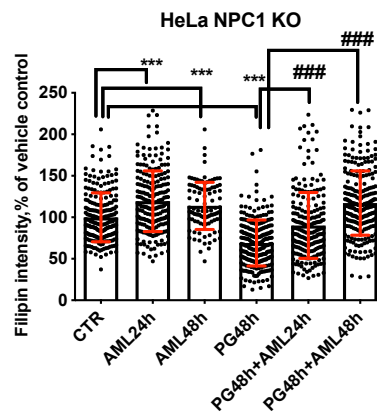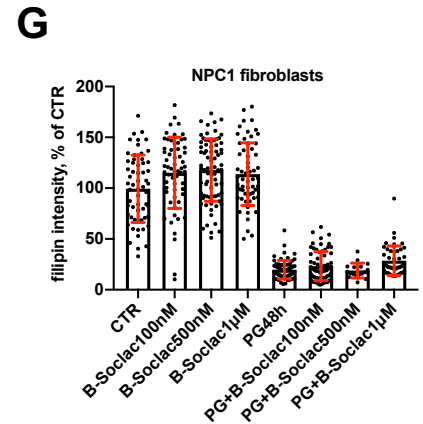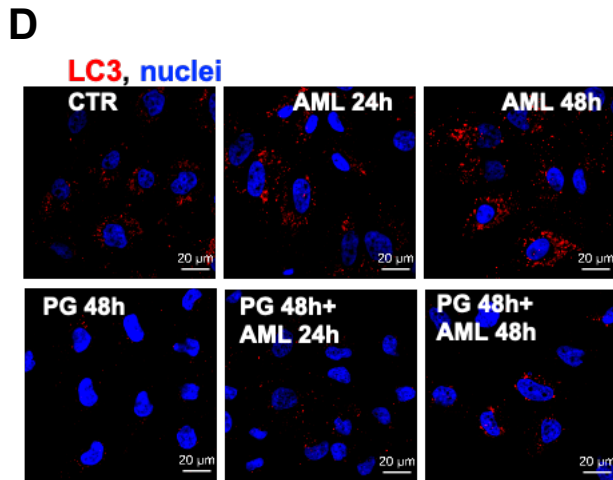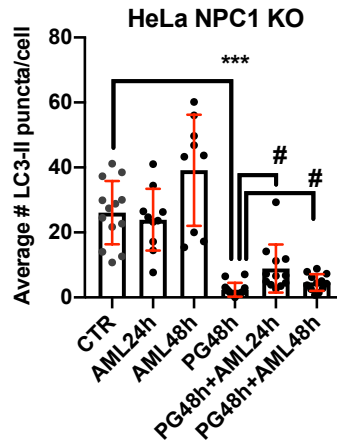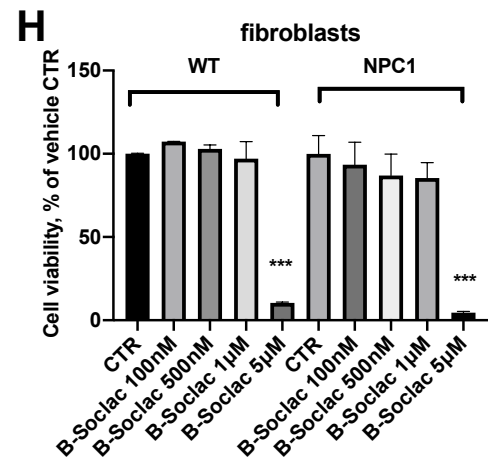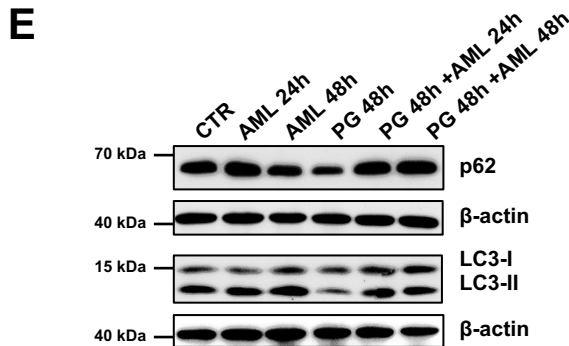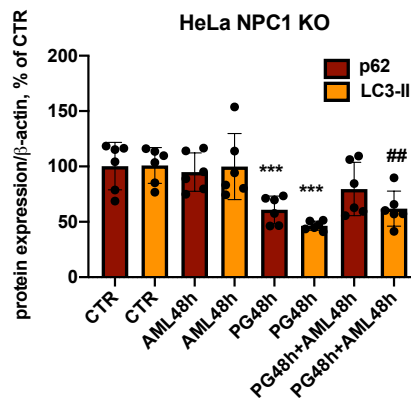

**Fig. S3. Related to Fig. 4. ASM inhibition reverses the effects of PG/LBPA administration in NPC1-knockout cells.**

*A*, ASM activity in parental and NPC1 KO HeLa cells treated with anionic phospholipids for 24 and 48h: PG (100 $\mu$ M), PC (100 $\mu$ M) and PC:LBPA (1:1 mol:mol) (100 $\mu$ M:100 $\mu$ M). \*\*\* $p$ <0.001 vs NPC1 KO control. ## $p$ <0.01 vs parental cell line (WT HeLa). *B*, efficient inhibition of ASM in AML treated NPC1 KO HeLa cells without and with 100 $\mu$ M PG treatment. AML concentration was 5 $\mu$ M. AML was added alone or together with PG for 48h. *C*, Representative epifluorescent images of filipin staining in NPC1 KO HeLa cells treated with DMSO (48h), AML alone (24 and 48h), PG alone (48h) or in combination of PG (48h) and AML (24 and 48h) and quantification. Filipin intensity was quantified in >50 cells in each group and data represented as % of DMSO control. Scale bar, 30 $\mu$ m. Statistically significant changes are indicated. \*\*\* $p$ <0.001 vs DMSO control: ### $p$ <0.001 vs PG alone in two-tailed Student's test. AML concentration 5 $\mu$ M. *D*, representative confocal images and image quantification of LC3-II in NPC1 KO HeLa cells treated with DMSO, AML, PG, or PG+AML at indicated time points as in *C*. LC3-II-positive puncta were quantified by intracellular staining using  $\alpha$ -LC3 antibody and represented as # per cell. Individual dots represent average # per cell/image. Average cell # in image is 8 cells. Scale bar is 20  $\mu$ m. \*\*\*: $p$ <0.001 compared to DMSO control, #: $p$ <0.05, in two-tailed Student's test. Error bars indicate SD. AML concentration 5 $\mu$ M, PG 100 $\mu$ M. *E*, Western blot and quantification of LC3-II and p62 autophagy markers in NPC1-deficient fibroblasts treated with DMSO, AML, PG, PG+AML as in *C* and *D*.  $\beta$ -actin was used as loading control. AML 5 $\mu$ M, PG 100 $\mu$ M. *F*, Acid ceramidase activity in NPC1 deficient fibroblasts treated with 100 $\mu$ M PG and 500nM or 1 $\mu$ M of the acid ceramidase inhibitor Bodipy-Soclac. Inhibitor was added alone or together with PG for 48h. *G*, Filipin intensity quantification in NPC1-deficient fibroblasts treated with PG (100 $\mu$ M) and indicated concentrations of Bodipy-Soclac. Bodipy-Soclac was added alone or together with PG for 48h. *H*, Cell viability assay for 48h treatment of WT and NPC1 fibroblasts with Bodipy-Soclac in concentration range 100nM-5 $\mu$ M. All graphical data expressed as mean  $\pm$  SD.

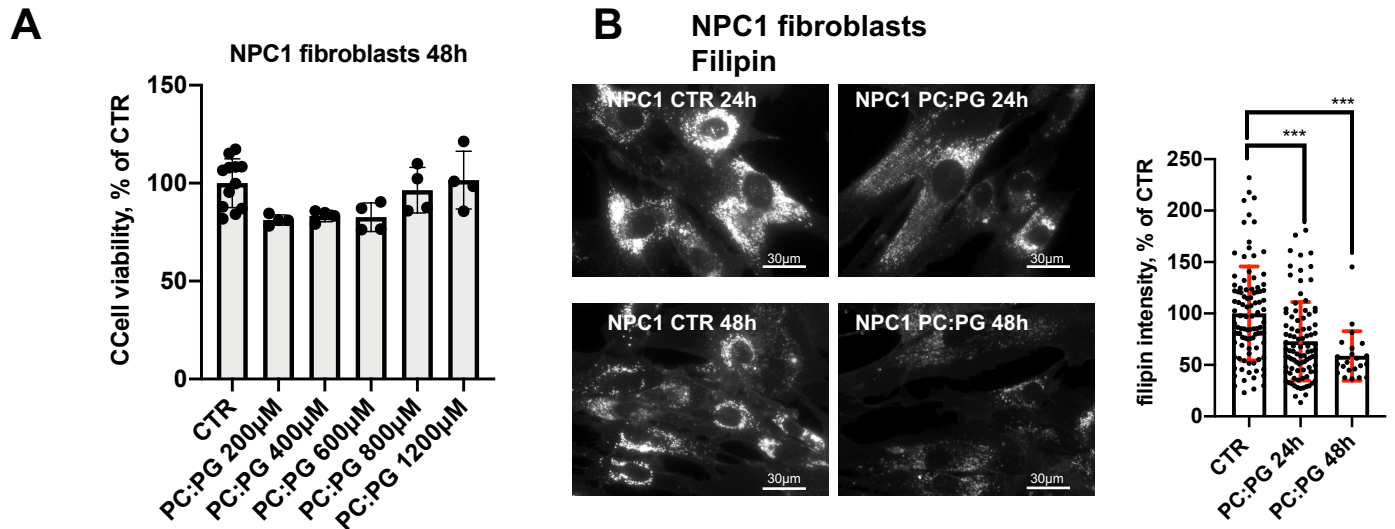

**Fig. S4. Related to Figure 6. Cell viability and filipin imaging following treatment with PC:PG.**  
*A*, cell viability following treatment with PC:PG at 48h. Cell viability was determined using Cell Titer-Glo assay. The concentration of total lipid is presented: e.g. 200µM PC:PG (1:1 mol:mol) (100µM PC+100µM PG). *B*, representative images and filipin quantification in PC:PG treated NPC1 fibroblasts at 24 and 48h. Scale bar, 30µm. Bar graph represents data from 2 independent experiments. \*\*\*:  $p < 0.001$  compared to untreated cells (CTR) in two-tailed t-test. 200µM PC:PG (1:1 mol:mol) (100µM PC+100µM PG). All graphed data show mean  $\pm$ SD.
